# Supplementary material
Source: PubMed Central journal article supplement (PMC3280049)
Supplement: supp_WNL.0b013e3182477eed_Figure_e-1.pdf [file supp_WNL.0b013e3182477eed_Figure_e-1.pdf]

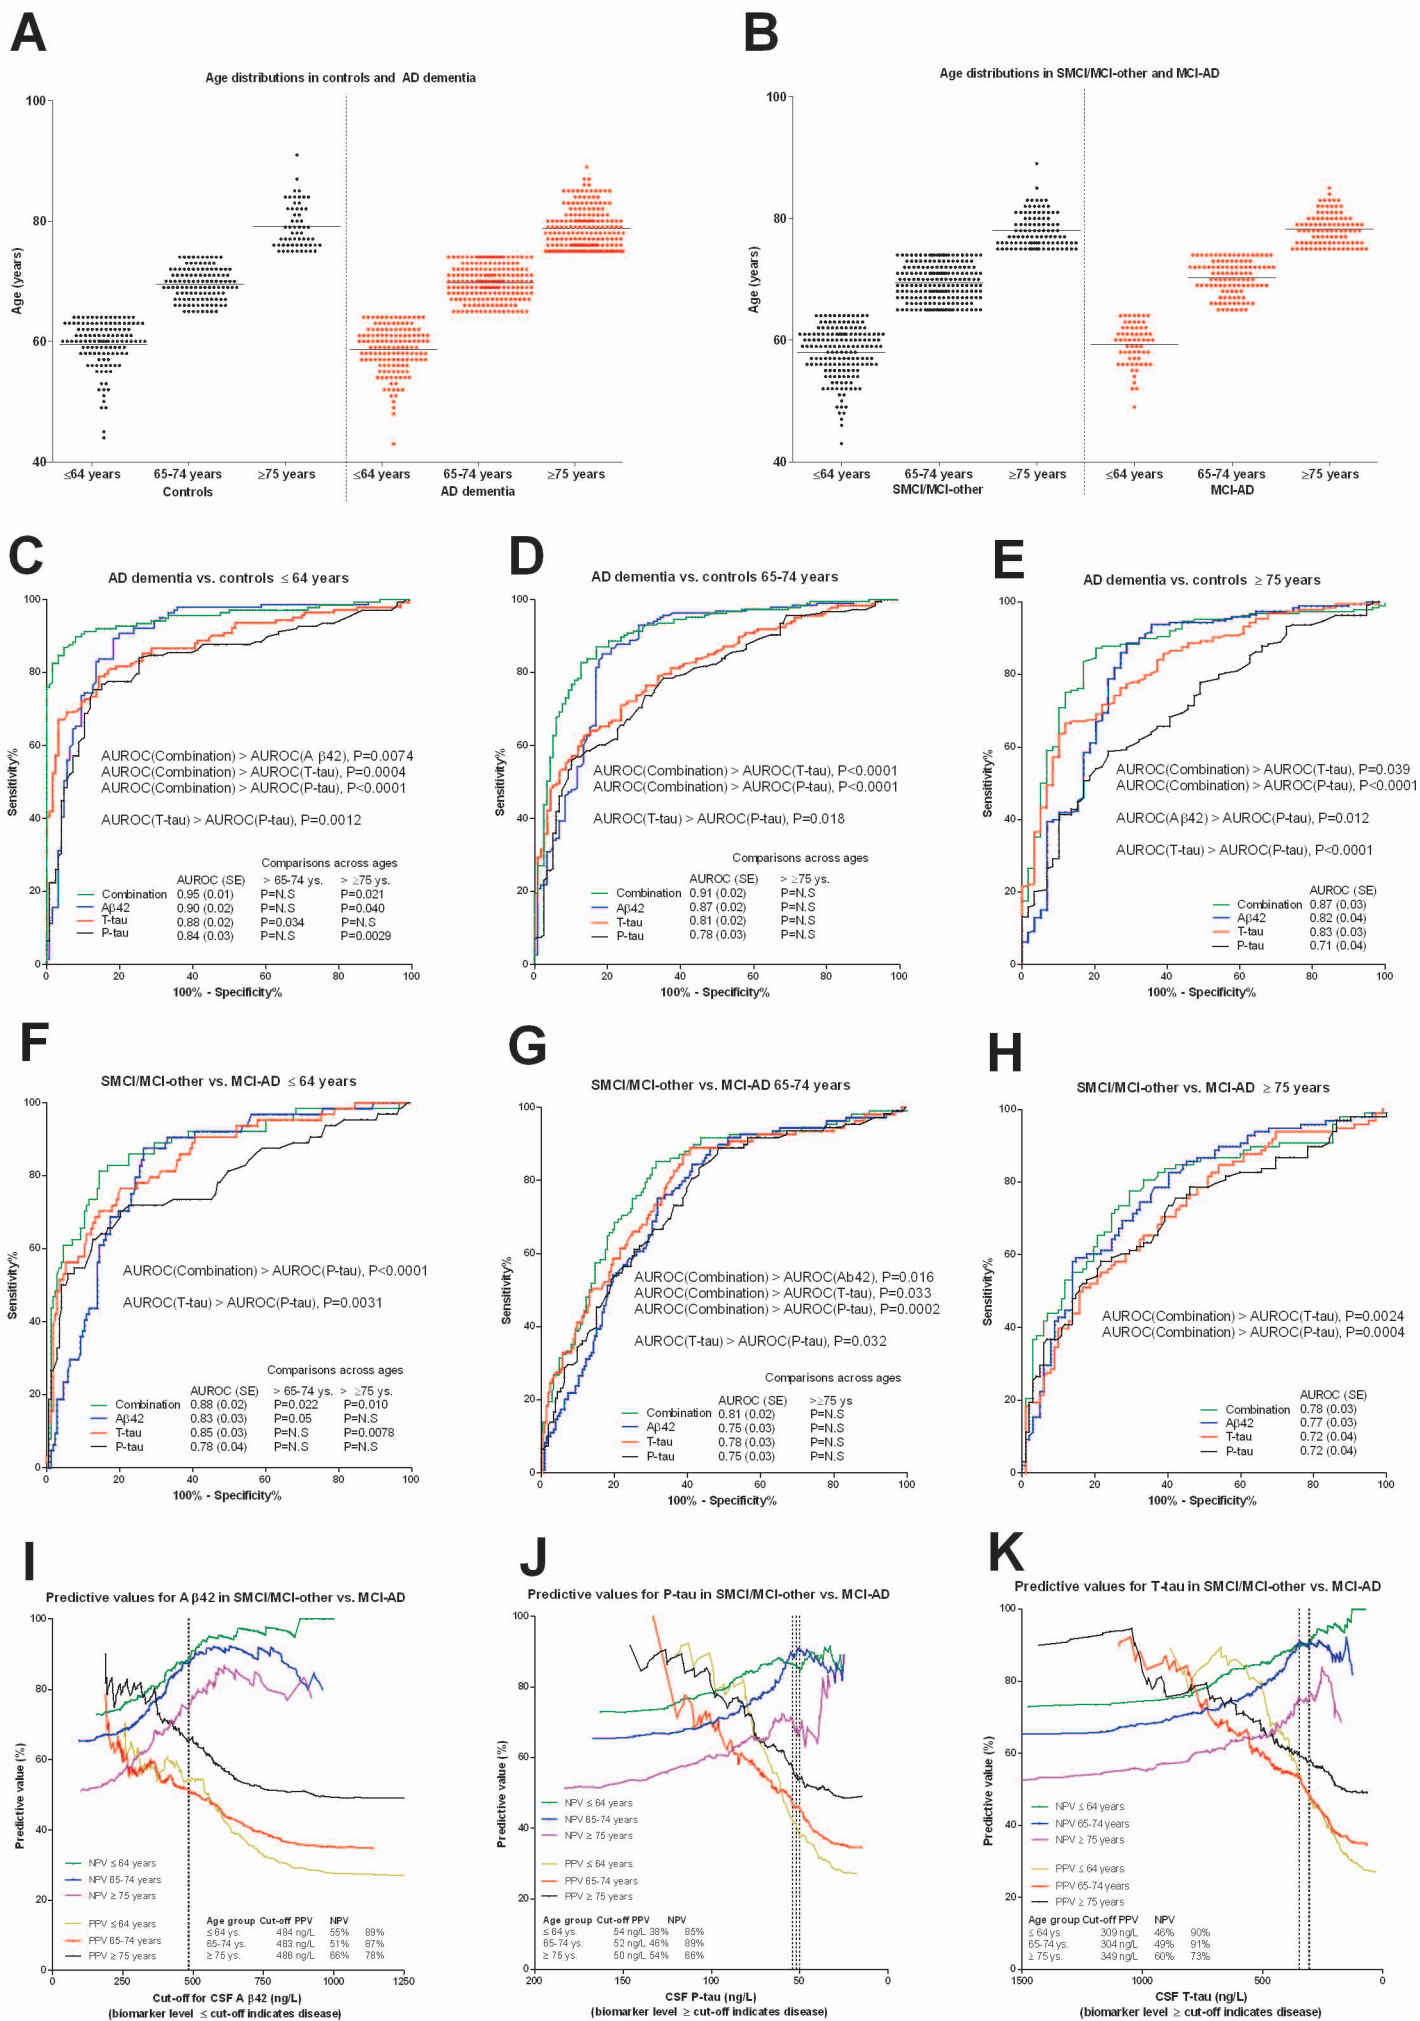

**Figure e-1.** Age level cut-distributions in controls and AD dementia (A), SMCI/MCI-other and MCI-AD (B). ROC curves for individual biomarkers and for a combination of biomarkers ("Combination") within age groups (panels C-H). Comparisons of AUROCs across age groups are shown in panels C-D and F-G. Predictive values across the entire ranges of possible cut-offs in MCI patients (panels I-K, the dotted lines indicate specific cut-offs generated at 85% sensitivity for AD dementia, data points with 95% confidence intervals ranging more than 50% are excluded).
