# Supplementary material
Source: PubMed Central journal article supplement (PMC3280049)
Supplement: supp_WNL.0b013e3182477eed_Figure_e-2.pdf [file supp_WNL.0b013e3182477eed_Figure_e-2.pdf]

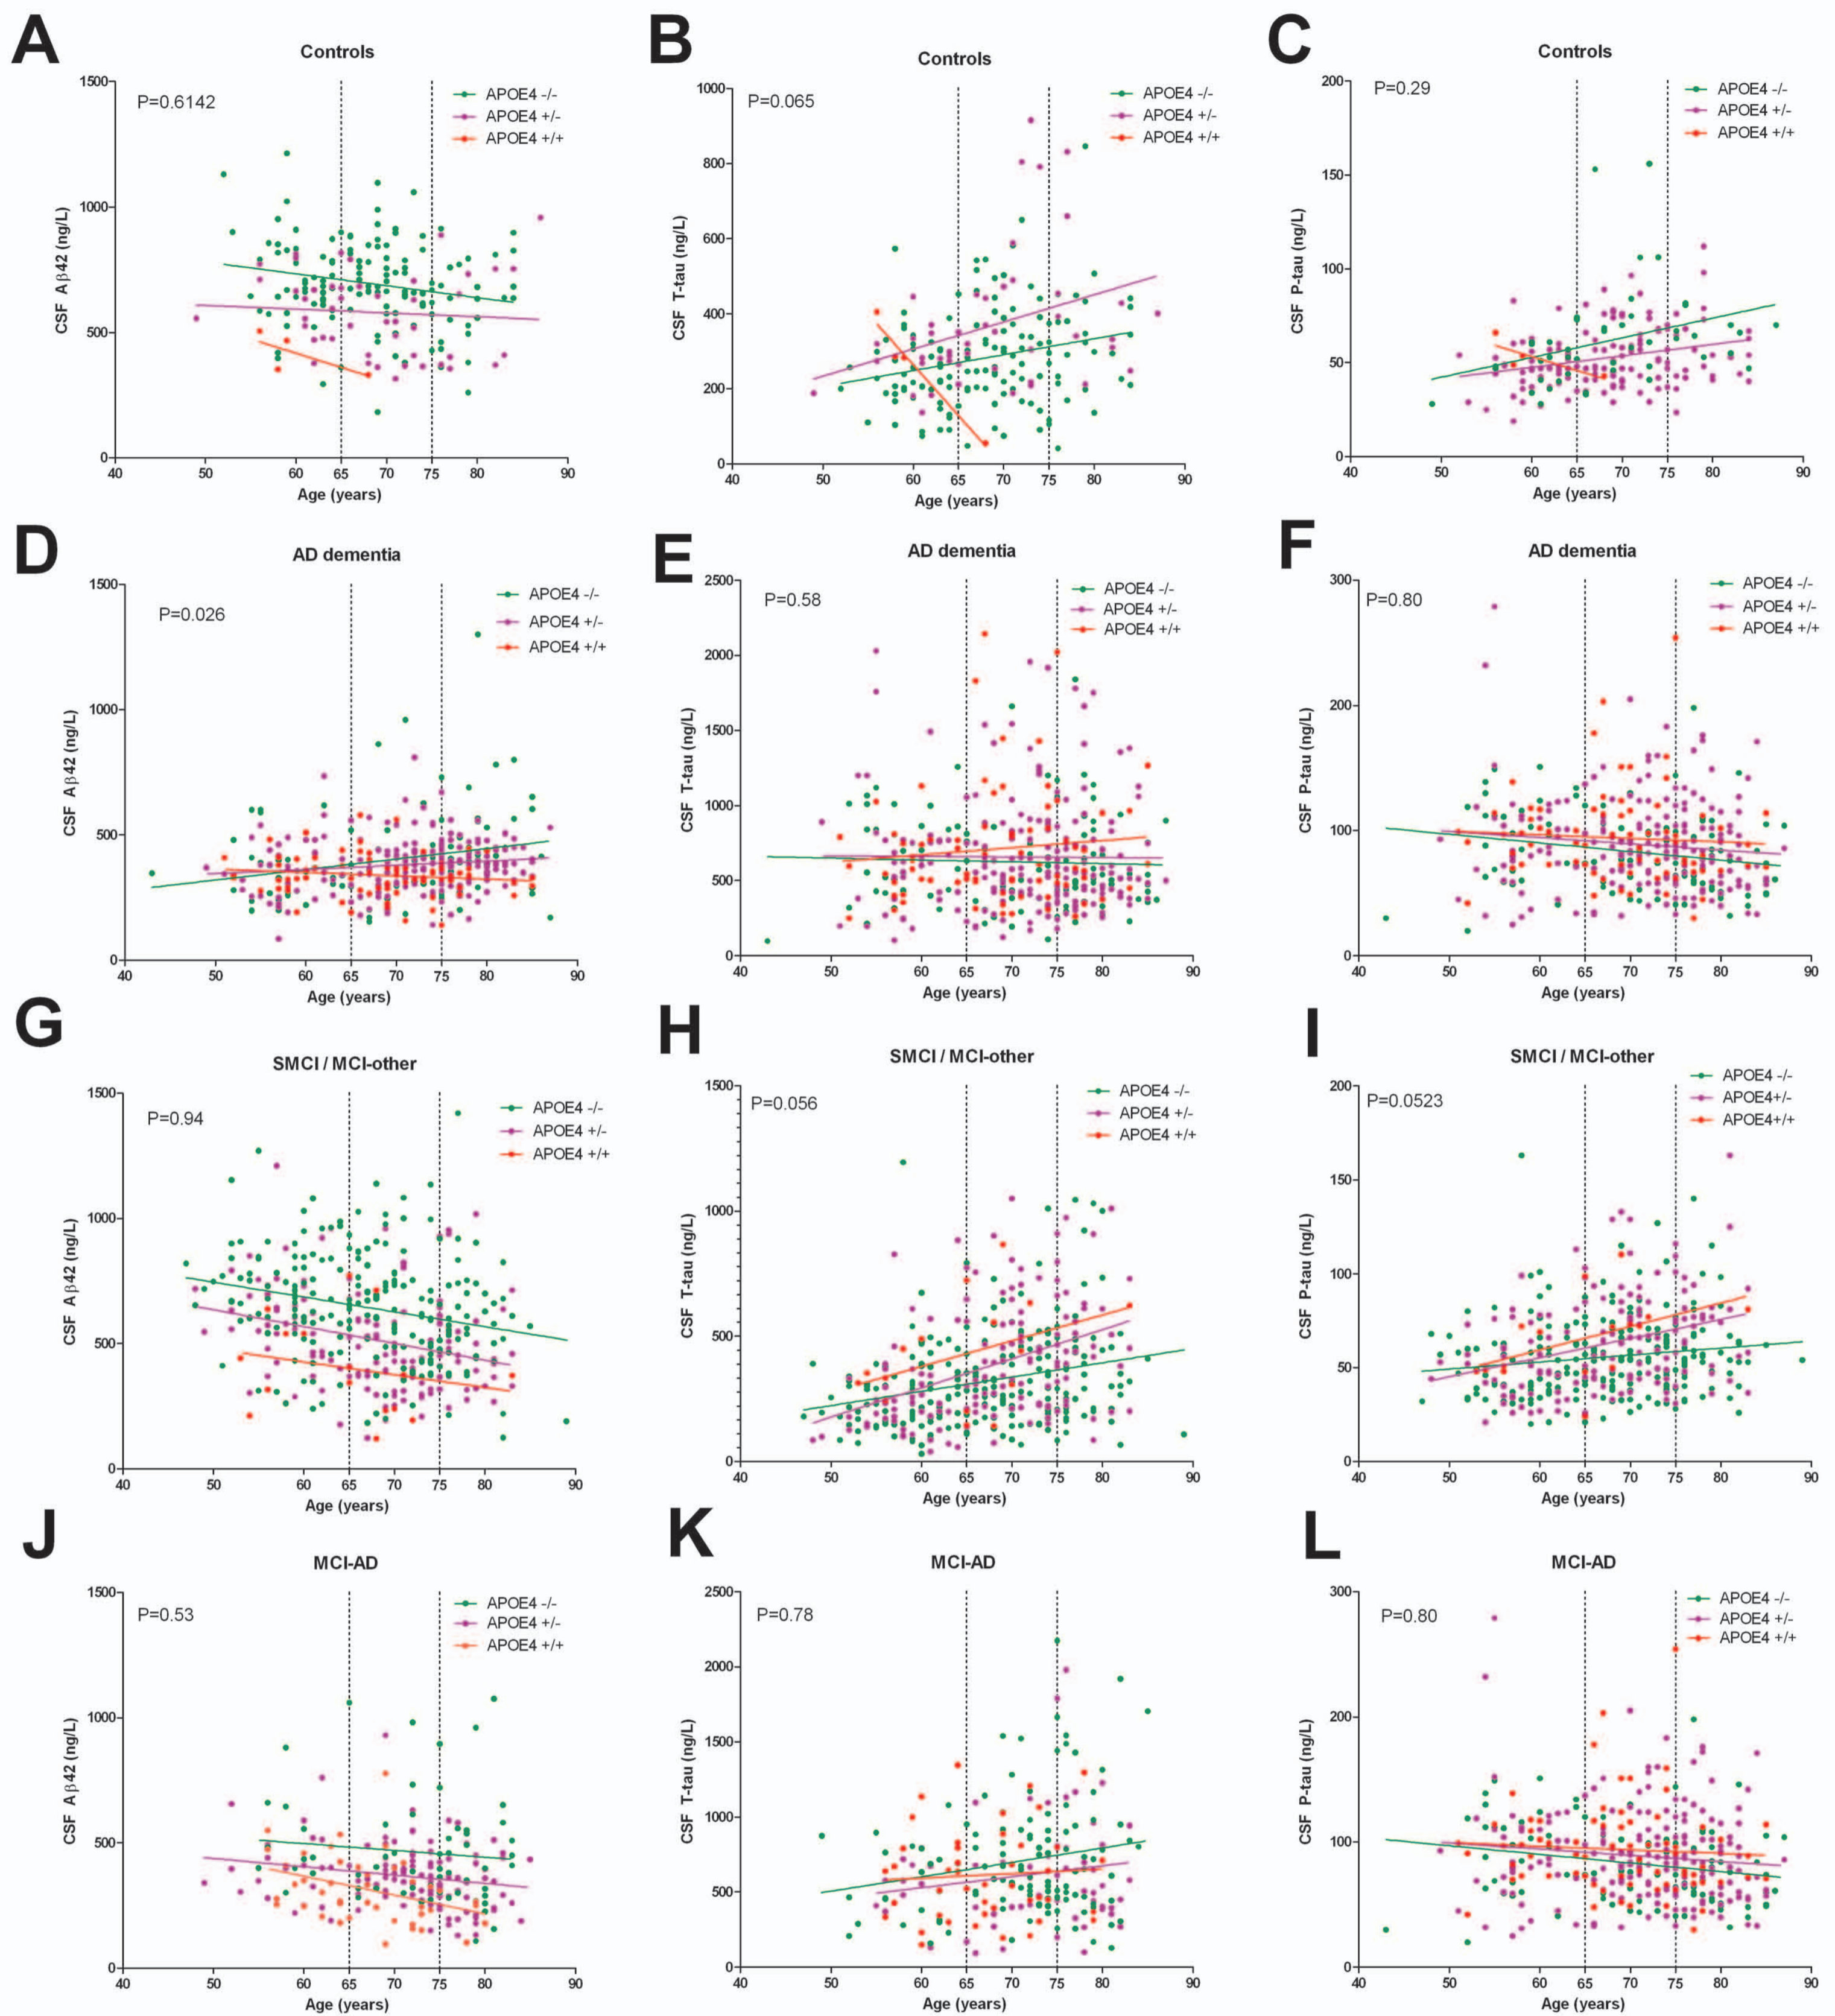

Figure e-2. Correlations between age and CSF biomarkers stratified by *APOE* genotype. Lines show linear regression curves for each *APOE* genotype. ANCOVA statistics was used to test if slopes differed among genotypes ( $P < 0.05$  indicates that the slopes differed significantly). On the whole, there were no major effects of *APOE* genotype on the relationships between age and biomarker levels. However, we noted that *APOE*  $\epsilon 4$  negative AD dementia patients had slightly higher  $A\beta 42$  levels with age than *APOE*  $\epsilon 4$  carriers. Among SMCI/MCI-other, *APOE*  $\epsilon 4$  carriers tended to increase more in T-tau and P-tau with age than *APOE*  $\epsilon 4$  negative subjects. One extreme outlier was removed from graph H (SMCI/MCI-other, *APOE*  $\epsilon 4$  +/-, CSF T-tau 2483 ng/L). When this outlier was included the P-value for slope differences was  $P = 0.0088$ .
